# Supplementary material for: Hand Hygiene, Face Mask Use, and Associated Factors during the COVID-19 Pandemic among the Students of Mongar Higher Secondary School, Bhutan: A Cross-Sectional Study
Source: MDPI journal article supplement (doi:10.3390/ijerph20021058), 2023-01-06
Supplement: s1 [file s1]

## Supplementary Tables

**Table S1.** Collinearity of factors included in the good hand-hygiene model using variance inflation factor.

| Variable           | VIF  | 1/VIF    |
|--------------------|------|----------|
| Sex                |      |          |
| Male               | 1.03 | 0.943743 |
| Grade              |      |          |
| 10                 | 1.75 | 0.571591 |
| 11                 | 3.02 | 0.331462 |
| 12                 | 2.80 | 0.356647 |
| Father education   |      |          |
| Primary            | 1.18 | 0.847548 |
| High school        | 1.63 | 0.615099 |
| Diploma            | 1.40 | 0.713282 |
| Bachelor and above | 1.44 | 0.694565 |
| Father occupation  |      |          |
| Civil Servant      | 2.08 | 0.481363 |
| Private employee   | 1.16 | 0.863512 |
| Driver             | 1.03 | 0.973201 |
| Others             | 1.09 | 0.915655 |
| Mean VIF           | 1.63 |          |

**Table S2.** Collinearity of factors included in the good face mask use model using variance inflation factor.

| Variable          | VIF  | 1/VIF    |
|-------------------|------|----------|
| Sex               |      |          |
| Male              | 1.01 | 0.992360 |
| Boarder           |      |          |
| Yes               | 1.33 | 0.753331 |
| Father occupation |      |          |
| Civil Servant     | 1.36 | 0.735063 |
| Private employee  | 1.15 | 0.869105 |
| Driver            | 1.02 | 0.97022  |
| Others            | 1.11 | 0.903781 |
|                   |      |          |
| Mean VIF          | 1.16 |          |

**Table S3.** Good hand hygiene stratified by grades among students of Mongar Higher Secondary School, Bhutan.

| Grades | Good n(%) | Bad n(%)   |
|--------|-----------|------------|
| 9      | 24 (45.3) | 29 (54.7)  |
| 10     | 11 (24.4) | 34 (75.6)  |
| 11     | 90 (31.8) | 193 (68.2) |

|    |           |           |
|----|-----------|-----------|
| 12 | 53 (35.3) | 97 (64.7) |
|----|-----------|-----------|

**Table S4.** Good mask use stratified by grades among students of Mongar Higher Secondary School, Bhutan.

| <b>Grades</b> | <b>Good mask use n (%)</b> | <b>Bad n(%)</b> |
|---------------|----------------------------|-----------------|
| 9             | 12 (22.6)                  | 41 (77.4)       |
| 10            | 8 (17.8)                   | 37 (82.2)       |
| 11            | 71 (25.1)                  | 212 (74.9)      |
| 12            | 27 (18.0)                  | 127 (18.0)      |
